# Supplementary material
Source: publisher figshare collection journal article supplement (https://acs.figshare.com/ndownloader/files/4763125)
Supplement: Supplementary file 1 [file 4763125]

  
data_KAu4In2 
  
_audit_creation_method            SHELXL-97 
_chemical_name_systematic 
; 
 ? 
; 
_chemical_name_common             ? 
_chemical_melting_point           ? 
_chemical_formula_moiety          ? 
_chemical_formula_sum 
 'Au4 In2 K' 
_chemical_formula_weight          1056.61 
  
loop_ 
 _atom_type_symbol 
 _atom_type_description 
 _atom_type_scat_dispersion_real 
 _atom_type_scat_dispersion_imag 
 _atom_type_scat_source 
 'K'  'K'   0.2009   0.2494 
 'International Tables Vol C Tables 4.2.6.8 and 6.1.1.4' 
 'In'  'In'  -0.7276   1.3100 
 'International Tables Vol C Tables 4.2.6.8 and 6.1.1.4' 
 'Au'  'Au'  -2.0133   8.8022 
 'International Tables Vol C Tables 4.2.6.8 and 6.1.1.4' 
  
_symmetry_cell_setting            Tetragonal 
_symmetry_space_group_name_H-M    I4/mcm 
  
loop_ 
 _symmetry_equiv_pos_as_xyz 
 'x, y, z' 
 '-x, -y, z' 
 '-y, x, z' 
 'y, -x, z' 
 '-x, y, -z+1/2' 
 'x, -y, -z+1/2' 
 'y, x, -z+1/2' 
 '-y, -x, -z+1/2' 
 'x+1/2, y+1/2, z+1/2' 
 '-x+1/2, -y+1/2, z+1/2' 
 '-y+1/2, x+1/2, z+1/2' 
 'y+1/2, -x+1/2, z+1/2' 
 '-x+1/2, y+1/2, -z+1' 
 'x+1/2, -y+1/2, -z+1' 
 'y+1/2, x+1/2, -z+1' 
 '-y+1/2, -x+1/2, -z+1' 
 '-x, -y, -z' 
 'x, y, -z' 
 'y, -x, -z' 
 '-y, x, -z' 
 'x, -y, z-1/2' 
 '-x, y, z-1/2' 
 '-y, -x, z-1/2' 
 'y, x, z-1/2' 
 '-x+1/2, -y+1/2, -z+1/2' 
 'x+1/2, y+1/2, -z+1/2' 
 'y+1/2, -x+1/2, -z+1/2' 
 '-y+1/2, x+1/2, -z+1/2' 
 'x+1/2, -y+1/2, z' 
 '-x+1/2, y+1/2, z' 
 '-y+1/2, -x+1/2, z' 
 'y+1/2, x+1/2, z' 
  
_cell_length_a                    8.6675(12) 
_cell_length_b                    8.6675(12) 
_cell_length_c                    8.3684(17) 
_cell_angle_alpha                 90.00 
_cell_angle_beta                  90.00 
_cell_angle_gamma                 90.00 
_cell_volume                      628.68(18) 
_cell_formula_units_Z             4 
_cell_measurement_temperature     293(2) 
_cell_measurement_reflns_used     ? 
_cell_measurement_theta_min       5 
_cell_measurement_theta_max       28 
  
_exptl_crystal_description        irregular
_exptl_crystal_colour             "copper metallic luster"
_exptl_crystal_size_max           0.27 
_exptl_crystal_size_mid           0.22 
_exptl_crystal_size_min           0.18 
_exptl_crystal_density_meas       ? 
_exptl_crystal_density_diffrn     11.163 
_exptl_crystal_density_method     'not measured' 
_exptl_crystal_F_000              1732 
_exptl_absorpt_coefficient_mu     100.725 
_exptl_absorpt_correction_type    numerical
_exptl_absorpt_correction_T_min   ? 
_exptl_absorpt_correction_T_max   ? 
_exptl_absorpt_process_details    ? 
  
_exptl_special_details 
; 
 ? 
; 
  
_diffrn_ambient_temperature       293(2) 
_diffrn_radiation_wavelength      0.71073 
_diffrn_radiation_type            MoK\a 
_diffrn_radiation_source          'fine-focus sealed tube' 
_diffrn_radiation_monochromator   graphite 
_diffrn_measurement_device_type   'Bruker P4' 
_diffrn_measurement_method        '\w scans' 
_diffrn_detector_area_resol_mean  ? 
_diffrn_standards_number          ? 
_diffrn_standards_interval_count  ? 
_diffrn_standards_interval_time   ? 
_diffrn_standards_decay_%         ? 
_diffrn_reflns_number             248 
_diffrn_reflns_av_R_equivalents   0.0000 
_diffrn_reflns_av_sigmaI/netI     0.0400 
_diffrn_reflns_limit_h_min        0 
_diffrn_reflns_limit_h_max        8 
_diffrn_reflns_limit_k_min        0 
_diffrn_reflns_limit_k_max        11 
_diffrn_reflns_limit_l_min        0 
_diffrn_reflns_limit_l_max        11 
_diffrn_reflns_theta_min          3.32 
_diffrn_reflns_theta_max          29.05 
_reflns_number_total              248 
_reflns_number_gt                 139 
_reflns_threshold_expression      >2sigma(I) 
  
_computing_data_collection        'Bruker XSCANS' 
_computing_cell_refinement        'Bruker XSCANS' 
_computing_data_reduction         'Bruker SHELXTL' 
_computing_structure_solution     'SHELXS-97 (Sheldrick, 1990)' 
_computing_structure_refinement   'SHELXL-97 (Sheldrick, 1997)' 
_computing_molecular_graphics     'Bruker SHELXTL' 
_computing_publication_material   'Bruker SHELXTL' 
  
_refine_special_details 
; 
 Refinement of F^2^ against ALL reflections.  The weighted R-factor wR and 
 goodness of fit S are based on F^2^, conventional R-factors R are based 
 on F, with F set to zero for negative F^2^. The threshold expression of 
 F^2^ > 2sigma(F^2^) is used only for calculating R-factors(gt) etc. and is 
 not relevant to the choice of reflections for refinement.  R-factors based 
 on F^2^ are statistically about twice as large as those based on F, and R- 
 factors based on ALL data will be even larger. 
; 
  
_refine_ls_structure_factor_coef  Fsqd 
_refine_ls_matrix_type            full 
_refine_ls_weighting_scheme       calc 
_refine_ls_weighting_details 
 'calc w=1/[\s^2^(Fo^2^)+(0.0545P)^2^+0.0000P] where P=(Fo^2^+2Fc^2^)/3' 
_atom_sites_solution_primary      direct 
_atom_sites_solution_secondary    difmap 
_atom_sites_solution_hydrogens    geom 
_refine_ls_hydrogen_treatment     mixed 
_refine_ls_extinction_method      SHELXL 
_refine_ls_extinction_coef        0.00075(13) 
_refine_ls_extinction_expression 
 'Fc^*^=kFc[1+0.001xFc^2^\l^3^/sin(2\q)]^-1/4^' 
_refine_ls_number_reflns          248 
_refine_ls_number_parameters      14 
_refine_ls_number_restraints      0 
_refine_ls_R_factor_all           0.0744 
_refine_ls_R_factor_gt            0.0411 
_refine_ls_wR_factor_ref          0.1116 
_refine_ls_wR_factor_gt           0.1060 
_refine_ls_goodness_of_fit_ref    1.028 
_refine_ls_restrained_S_all       1.028 
_refine_ls_shift/su_max           0.000 
_refine_ls_shift/su_mean          0.000 
  
loop_ 
 _atom_site_label 
 _atom_site_type_symbol 
 _atom_site_fract_x 
 _atom_site_fract_y 
 _atom_site_fract_z 
 _atom_site_U_iso_or_equiv 
 _atom_site_adp_type 
 _atom_site_occupancy 
 _atom_site_symmetry_multiplicity 
 _atom_site_calc_flag 
 _atom_site_refinement_flags 
 _atom_site_disorder_assembly 
 _atom_site_disorder_group 
Au Au 0.14983(12) 0.64983(12) 0.33474(13) 0.0215(5) Uani 1 2 d S . . 
In In 0.1466(4) 0.6466(4) 0.0000 0.0203(7) Uani 1 4 d S . . 
K K 0.0000 0.0000 0.2500 0.042(5) Uani 1 8 d S . . 
  
loop_ 
 _atom_site_aniso_label 
 _atom_site_aniso_U_11 
 _atom_site_aniso_U_22 
 _atom_site_aniso_U_33 
 _atom_site_aniso_U_23 
 _atom_site_aniso_U_13 
 _atom_site_aniso_U_12 
Au 0.0236(6) 0.0236(6) 0.0175(7) 0.0003(5) 0.0003(5) -0.0028(8) 
In 0.0209(10) 0.0209(10) 0.0193(13) 0.000 0.000 0.001(3) 
K 0.031(5) 0.031(5) 0.062(13) 0.000 0.000 0.000 
  
_geom_special_details 
; 
 All esds (except the esd in the dihedral angle between two l.s. planes) 
 are estimated using the full covariance matrix.  The cell esds are taken 
 into account individually in the estimation of esds in distances, angles 
 and torsion angles; correlations between esds in cell parameters are only 
 used when they are defined by crystal symmetry.  An approximate (isotropic) 
 treatment of cell esds is used for estimating esds involving l.s. planes. 
; 
  
loop_ 
 _geom_bond_atom_site_label_1 
 _geom_bond_atom_site_label_2 
 _geom_bond_distance 
 _geom_bond_site_symmetry_2 
 _geom_bond_publ_flag 
Au Au 2.766(2) 18_556 ? 
Au In 2.8015(13) . ? 
Au Au 2.836(3) 25_565 ? 
Au In 2.853(4) 25_565 ? 
Au In 2.918(3) 11 ? 
Au In 2.918(3) 27_455 ? 
Au Au 2.959(2) 28 ? 
Au Au 2.959(2) 27_455 ? 
Au K 3.3765(7) 1_565 ? 
Au K 3.3765(7) 25 ? 
In Au 2.8015(13) 18 ? 
In Au 2.853(4) 25_565 ? 
In Au 2.853(4) 10_564 ? 
In Au 2.918(3) 11_554 ? 
In Au 2.918(3) 12_454 ? 
In Au 2.918(3) 28 ? 
In Au 2.918(3) 27_455 ? 
In K 3.9210(17) 1_565 ? 
In K 3.9210(17) 25 ? 
In K 3.9210(17) 17_565 ? 
In K 3.9210(17) 9_554 ? 
K Au 3.3765(7) 28_545 ? 
K Au 3.3765(7) 3_655 ? 
K Au 3.3765(7) 27_455 ? 
K Au 3.3765(7) 4_455 ? 
K Au 3.3765(7) 2_565 ? 
K Au 3.3765(7) 1_545 ? 
K Au 3.3765(7) 26_445 ? 
K Au 3.3765(7) 25 ? 
K In 3.9210(17) 27_455 ? 
K In 3.9210(17) 19_455 ? 
K In 3.9210(17) 1_545 ? 
K In 3.9210(17) 25 ? 
  
loop_ 
 _geom_angle_atom_site_label_1 
 _geom_angle_atom_site_label_2 
 _geom_angle_atom_site_label_3 
 _geom_angle 
 _geom_angle_site_symmetry_1 
 _geom_angle_site_symmetry_3 
 _geom_angle_publ_flag 
Au Au In 179.19(12) 18_556 . ? 
Au Au Au 120.01(5) 18_556 25_565 ? 
In Au Au 60.81(11) . 25_565 ? 
Au Au In 61.00(5) 18_556 25_565 ? 
In Au In 119.81(9) . 25_565 ? 
Au Au In 59.00(5) 25_565 25_565 ? 
Au Au In 61.71(3) 18_556 11 ? 
In Au In 117.71(7) . 11 ? 
Au Au In 141.45(9) 25_565 11 ? 
In Au In 108.71(7) 25_565 11 ? 
Au Au In 61.71(3) 18_556 27_455 ? 
In Au In 117.71(7) . 27_455 ? 
Au Au In 141.45(9) 25_565 27_455 ? 
In Au In 108.71(7) 25_565 27_455 ? 
In Au In 76.02(17) 11 27_455 ? 
Au Au Au 118.64(4) 18_556 28 ? 
In Au Au 60.79(8) . 28 ? 
Au Au Au 107.32(6) 25_565 28 ? 
In Au Au 140.817(11) 25_565 28 ? 
In Au Au 56.93(3) 11 28 ? 
In Au Au 102.63(7) 27_455 28 ? 
Au Au Au 118.64(4) 18_556 27_455 ? 
In Au Au 60.79(8) . 27_455 ? 
Au Au Au 107.32(6) 25_565 27_455 ? 
In Au Au 140.817(11) 25_565 27_455 ? 
In Au Au 102.63(7) 11 27_455 ? 
In Au Au 56.93(3) 27_455 27_455 ? 
Au Au Au 76.72(4) 28 27_455 ? 
Au Au K 102.123(19) 18_556 1_565 ? 
In Au K 78.18(5) . 1_565 ? 
Au Au K 65.17(2) 25_565 1_565 ? 
In Au K 77.51(2) 25_565 1_565 ? 
In Au K 76.68(7) 11 1_565 ? 
In Au K 152.53(10) 27_455 1_565 ? 
Au Au K 64.01(2) 28 1_565 ? 
Au Au K 133.49(5) 27_455 1_565 ? 
Au Au K 102.123(19) 18_556 25 ? 
In Au K 78.18(5) . 25 ? 
Au Au K 65.17(2) 25_565 25 ? 
In Au K 77.51(2) 25_565 25 ? 
In Au K 152.53(10) 11 25 ? 
In Au K 76.68(7) 27_455 25 ? 
Au Au K 133.49(5) 28 25 ? 
Au Au K 64.01(2) 27_455 25 ? 
K Au K 130.34(4) 1_565 25 ? 
Au In Au 178.4(2) . 18 ? 
Au In Au 60.19(9) . 25_565 ? 
Au In Au 118.18(16) 18 25_565 ? 
Au In Au 118.18(16) . 10_564 ? 
Au In Au 60.19(9) 18 10_564 ? 
Au In Au 57.99(9) 25_565 10_564 ? 
Au In Au 118.86(11) . 11_554 ? 
Au In Au 62.28(7) 18 11_554 ? 
Au In Au 140.21(8) 25_565 11_554 ? 
Au In Au 107.99(5) 10_564 11_554 ? 
Au In Au 118.86(11) . 12_454 ? 
Au In Au 62.28(7) 18 12_454 ? 
Au In Au 140.21(8) 25_565 12_454 ? 
Au In Au 107.99(5) 10_564 12_454 ? 
Au In Au 78.01(13) 11_554 12_454 ? 
Au In Au 62.28(7) . 28 ? 
Au In Au 118.86(11) 18 28 ? 
Au In Au 107.99(5) 25_565 28 ? 
Au In Au 140.21(8) 10_564 28 ? 
Au In Au 56.58(7) 11_554 28 ? 
Au In Au 103.98(17) 12_454 28 ? 
Au In Au 62.28(7) . 27_455 ? 
Au In Au 118.86(11) 18 27_455 ? 
Au In Au 107.99(5) 25_565 27_455 ? 
Au In Au 140.21(8) 10_564 27_455 ? 
Au In Au 103.98(17) 11_554 27_455 ? 
Au In Au 56.58(7) 12_454 27_455 ? 
Au In Au 78.01(13) 28 27_455 ? 
Au In K 57.45(3) . 1_565 ? 
Au In K 121.93(6) 18 1_565 ? 
Au In K 57.22(5) 25_565 1_565 ? 
Au In K 88.62(9) 10_564 1_565 ? 
Au In K 87.71(2) 11_554 1_565 ? 
Au In K 160.71(15) 12_454 1_565 ? 
Au In K 56.93(2) 28 1_565 ? 
Au In K 115.98(5) 27_455 1_565 ? 
Au In K 57.45(3) . 25 ? 
Au In K 121.93(6) 18 25 ? 
Au In K 57.22(5) 25_565 25 ? 
Au In K 88.62(9) 10_564 25 ? 
Au In K 160.71(15) 11_554 25 ? 
Au In K 87.71(2) 12_454 25 ? 
Au In K 115.98(5) 28 25 ? 
Au In K 56.93(2) 27_455 25 ? 
K In K 102.80(6) 1_565 25 ? 
Au In K 121.93(6) . 17_565 ? 
Au In K 57.45(3) 18 17_565 ? 
Au In K 88.62(9) 25_565 17_565 ? 
Au In K 57.22(5) 10_564 17_565 ? 
Au In K 56.93(2) 11_554 17_565 ? 
Au In K 115.98(5) 12_454 17_565 ? 
Au In K 87.71(2) 28 17_565 ? 
Au In K 160.71(15) 27_455 17_565 ? 
K In K 64.49(3) 1_565 17_565 ? 
K In K 142.28(14) 25 17_565 ? 
Au In K 121.93(6) . 9_554 ? 
Au In K 57.45(3) 18 9_554 ? 
Au In K 88.62(9) 25_565 9_554 ? 
Au In K 57.22(5) 10_564 9_554 ? 
Au In K 115.98(5) 11_554 9_554 ? 
Au In K 56.93(2) 12_454 9_554 ? 
Au In K 160.71(15) 28 9_554 ? 
Au In K 87.71(2) 27_455 9_554 ? 
K In K 142.28(14) 1_565 9_554 ? 
K In K 64.49(3) 25 9_554 ? 
K In K 102.80(6) 17_565 9_554 ? 
Au K Au 137.35(5) 28_545 3_655 ? 
Au K Au 155.75(4) 28_545 27_455 ? 
Au K Au 49.66(4) 3_655 27_455 ? 
Au K Au 49.66(4) 28_545 4_455 ? 
Au K Au 155.75(4) 3_655 4_455 ? 
Au K Au 137.35(5) 27_455 4_455 ? 
Au K Au 134.76(5) 28_545 2_565 ? 
Au K Au 87.472(8) 3_655 2_565 ? 
Au K Au 51.98(5) 27_455 2_565 ? 
Au K Au 87.472(8) 4_455 2_565 ? 
Au K Au 51.98(5) 28_545 1_545 ? 
Au K Au 87.472(8) 3_655 1_545 ? 
Au K Au 134.76(5) 27_455 1_545 ? 
Au K Au 87.472(8) 4_455 1_545 ? 
Au K Au 155.75(4) 2_565 1_545 ? 
Au K Au 87.472(8) 28_545 26_445 ? 
Au K Au 134.76(5) 3_655 26_445 ? 
Au K Au 87.472(8) 27_455 26_445 ? 
Au K Au 51.98(5) 4_455 26_445 ? 
Au K Au 49.66(4) 2_565 26_445 ? 
Au K Au 137.35(5) 1_545 26_445 ? 
Au K Au 87.472(8) 28_545 25 ? 
Au K Au 51.98(5) 3_655 25 ? 
Au K Au 87.472(8) 27_455 25 ? 
Au K Au 134.76(5) 4_455 25 ? 
Au K Au 137.35(5) 2_565 25 ? 
Au K Au 49.66(4) 1_545 25 ? 
Au K Au 155.75(4) 26_445 25 ? 
Au K In 159.87(2) 28_545 27_455 ? 
Au K In 45.27(5) 3_655 27_455 ? 
Au K In 44.37(2) 27_455 27_455 ? 
Au K In 118.66(4) 4_455 27_455 ? 
Au K In 46.40(6) 2_565 27_455 ? 
Au K In 117.75(5) 1_545 27_455 ? 
Au K In 95.90(8) 26_445 27_455 ? 
Au K In 96.96(8) 25 27_455 ? 
Au K In 45.27(5) 28_545 19_455 ? 
Au K In 159.87(2) 3_655 19_455 ? 
Au K In 118.66(4) 27_455 19_455 ? 
Au K In 44.37(2) 4_455 19_455 ? 
Au K In 95.90(8) 2_565 19_455 ? 
Au K In 96.96(8) 1_545 19_455 ? 
Au K In 46.40(6) 26_445 19_455 ? 
Au K In 117.75(5) 25 19_455 ? 
In K In 142.28(14) 27_455 19_455 ? 
Au K In 46.40(6) 28_545 1_545 ? 
Au K In 96.96(8) 3_655 1_545 ? 
Au K In 117.75(5) 27_455 1_545 ? 
Au K In 95.90(8) 4_455 1_545 ? 
Au K In 159.87(2) 2_565 1_545 ? 
Au K In 44.37(2) 1_545 1_545 ? 
Au K In 118.66(4) 26_445 1_545 ? 
Au K In 45.27(5) 25 1_545 ? 
In K In 142.19(12) 27_455 1_545 ? 
In K In 73.460(15) 19_455 1_545 ? 
Au K In 96.96(8) 28_545 25 ? 
Au K In 46.40(6) 3_655 25 ? 
Au K In 95.90(8) 27_455 25 ? 
Au K In 117.75(5) 4_455 25 ? 
Au K In 118.66(4) 2_565 25 ? 
Au K In 45.27(5) 1_545 25 ? 
Au K In 159.87(2) 26_445 25 ? 
Au K In 44.37(2) 25 25 ? 
In K In 73.460(15) 27_455 25 ? 
In K In 142.19(12) 19_455 25 ? 
In K In 77.20(6) 1_545 25 ? 
  
_diffrn_measured_fraction_theta_max    1.000 
_diffrn_reflns_theta_full              25.00 
_diffrn_measured_fraction_theta_full   1.000 
_refine_diff_density_max    3.576 
_refine_diff_density_min   -2.959 
_refine_diff_density_rms    0.756 
#===END
  
data_RbAu4In2
  
_audit_creation_method            SHELXL-97 
_chemical_name_systematic 
; 
 ? 
; 
_chemical_name_common             ? 
_chemical_melting_point           ? 
_chemical_formula_moiety          ? 
_chemical_formula_sum 
 'Au4 In2 Rb' 
_chemical_formula_weight          1102.98 
  
loop_ 
 _atom_type_symbol 
 _atom_type_description 
 _atom_type_scat_dispersion_real 
 _atom_type_scat_dispersion_imag 
 _atom_type_scat_source 
 'Rb'  'Rb'  -0.9393   2.9676 
 'International Tables Vol C Tables 4.2.6.8 and 6.1.1.4' 
 'In'  'In'  -0.7276   1.3100 
 'International Tables Vol C Tables 4.2.6.8 and 6.1.1.4' 
 'Au'  'Au'  -2.0133   8.8022 
 'International Tables Vol C Tables 4.2.6.8 and 6.1.1.4' 
  
_symmetry_cell_setting            Tetragonal 
_symmetry_space_group_name_H-M    I4/mcm 
  
loop_ 
 _symmetry_equiv_pos_as_xyz 
 'x, y, z' 
 '-x, -y, z' 
 '-y, x, z' 
 'y, -x, z' 
 '-x, y, -z+1/2' 
 'x, -y, -z+1/2' 
 'y, x, -z+1/2' 
 '-y, -x, -z+1/2' 
 'x+1/2, y+1/2, z+1/2' 
 '-x+1/2, -y+1/2, z+1/2' 
 '-y+1/2, x+1/2, z+1/2' 
 'y+1/2, -x+1/2, z+1/2' 
 '-x+1/2, y+1/2, -z+1' 
 'x+1/2, -y+1/2, -z+1' 
 'y+1/2, x+1/2, -z+1' 
 '-y+1/2, -x+1/2, -z+1' 
 '-x, -y, -z' 
 'x, y, -z' 
 'y, -x, -z' 
 '-y, x, -z' 
 'x, -y, z-1/2' 
 '-x, y, z-1/2' 
 '-y, -x, z-1/2' 
 'y, x, z-1/2' 
 '-x+1/2, -y+1/2, -z+1/2' 
 'x+1/2, y+1/2, -z+1/2' 
 'y+1/2, -x+1/2, -z+1/2' 
 '-y+1/2, x+1/2, -z+1/2' 
 'x+1/2, -y+1/2, z' 
 '-x+1/2, y+1/2, z' 
 '-y+1/2, -x+1/2, z' 
 'y+1/2, x+1/2, z' 
  
_cell_length_a                    8.8349(12) 
_cell_length_b                    8.8349(12) 
_cell_length_c                    8.2736(17) 
_cell_angle_alpha                 90.00 
_cell_angle_beta                  90.00 
_cell_angle_gamma                 90.00 
_cell_volume                      645.80(18) 
_cell_formula_units_Z             4 
_cell_measurement_temperature     293(2) 
_cell_measurement_reflns_used     ? 
_cell_measurement_theta_min       5 
_cell_measurement_theta_max       28 
  
_exptl_crystal_description        irregular 
_exptl_crystal_colour             "copper metallic luster" 
_exptl_crystal_size_max           0.29 
_exptl_crystal_size_mid           0.23 
_exptl_crystal_size_min           0.15 
_exptl_crystal_density_meas       ? 
_exptl_crystal_density_diffrn     11.344 
_exptl_crystal_density_method     'not measured' 
_exptl_crystal_F_000              1804 
_exptl_absorpt_coefficient_mu     104.899 
_exptl_absorpt_correction_type    numerical
_exptl_absorpt_correction_T_min   ? 
_exptl_absorpt_correction_T_max   ? 
_exptl_absorpt_process_details    ? 
  
_exptl_special_details 
; 
 ? 
; 
  
_diffrn_ambient_temperature       293(2) 
_diffrn_radiation_wavelength      0.71073 
_diffrn_radiation_type            MoK\a 
_diffrn_radiation_source          'fine-focus sealed tube' 
_diffrn_radiation_monochromator   graphite 
_diffrn_measurement_device_type   'Bruker P4' 
_diffrn_measurement_method        '\w scans' 
_diffrn_detector_area_resol_mean  ? 
_diffrn_standards_number          ? 
_diffrn_standards_interval_count  ? 
_diffrn_standards_interval_time   ? 
_diffrn_standards_decay_%         ? 
_diffrn_reflns_number             443 
_diffrn_reflns_av_R_equivalents   0.0426 
_diffrn_reflns_av_sigmaI/netI     0.0518 
_diffrn_reflns_limit_h_min        -8 
_diffrn_reflns_limit_h_max        8 
_diffrn_reflns_limit_k_min        0 
_diffrn_reflns_limit_k_max        12 
_diffrn_reflns_limit_l_min        0 
_diffrn_reflns_limit_l_max        11 
_diffrn_reflns_theta_min          3.26 
_diffrn_reflns_theta_max          29.32 
_reflns_number_total              259 
_reflns_number_gt                 166 
_reflns_threshold_expression      >2sigma(I) 
  
_computing_data_collection        'Bruker XSCANS' 
_computing_cell_refinement        'Bruker XSCANS' 
_computing_data_reduction         'Bruker SHELXTL' 
_computing_structure_solution     'SHELXS-97 (Sheldrick, 1990)' 
_computing_structure_refinement   'SHELXL-97 (Sheldrick, 1997)' 
_computing_molecular_graphics     'Bruker SHELXTL' 
_computing_publication_material   'Bruker SHELXTL' 
  
_refine_special_details 
; 
 Refinement of F^2^ against ALL reflections.  The weighted R-factor wR and 
 goodness of fit S are based on F^2^, conventional R-factors R are based 
 on F, with F set to zero for negative F^2^. The threshold expression of 
 F^2^ > 2sigma(F^2^) is used only for calculating R-factors(gt) etc. and is 
 not relevant to the choice of reflections for refinement.  R-factors based 
 on F^2^ are statistically about twice as large as those based on F, and R- 
 factors based on ALL data will be even larger. 
; 
  
_refine_ls_structure_factor_coef  Fsqd 
_refine_ls_matrix_type            full 
_refine_ls_weighting_scheme       calc 
_refine_ls_weighting_details 
 'calc w=1/[\s^2^(Fo^2^)+(0.0501P)^2^+0.0000P] where P=(Fo^2^+2Fc^2^)/3' 
_atom_sites_solution_primary      direct 
_atom_sites_solution_secondary    difmap 
_atom_sites_solution_hydrogens    geom 
_refine_ls_hydrogen_treatment     mixed 
_refine_ls_extinction_method      SHELXL 
_refine_ls_extinction_coef        0.00055(14) 
_refine_ls_extinction_expression 
 'Fc^*^=kFc[1+0.001xFc^2^\l^3^/sin(2\q)]^-1/4^' 
_refine_ls_number_reflns          259 
_refine_ls_number_parameters      14 
_refine_ls_number_restraints      0 
_refine_ls_R_factor_all           0.0832 
_refine_ls_R_factor_gt            0.0540 
_refine_ls_wR_factor_ref          0.1363 
_refine_ls_wR_factor_gt           0.1299 
_refine_ls_goodness_of_fit_ref    1.247 
_refine_ls_restrained_S_all       1.247 
_refine_ls_shift/su_max           0.000 
_refine_ls_shift/su_mean          0.000 
  
loop_ 
 _atom_site_label 
 _atom_site_type_symbol 
 _atom_site_fract_x 
 _atom_site_fract_y 
 _atom_site_fract_z 
 _atom_site_U_iso_or_equiv 
 _atom_site_adp_type 
 _atom_site_occupancy 
 _atom_site_symmetry_multiplicity 
 _atom_site_calc_flag 
 _atom_site_refinement_flags 
 _atom_site_disorder_assembly 
 _atom_site_disorder_group 
Au Au 0.15197(12) 0.65197(12) 0.33447(15) 0.0217(6) Uani 1 2 d S . . 
In In 0.1410(3) 0.6410(3) 0.0000 0.0193(9) Uani 1 4 d S . . 
Rb Rb 0.0000 0.0000 0.2500 0.075(6) Uani 1 8 d S . . 
  
loop_ 
 _atom_site_aniso_label 
 _atom_site_aniso_U_11 
 _atom_site_aniso_U_22 
 _atom_site_aniso_U_33 
 _atom_site_aniso_U_23 
 _atom_site_aniso_U_13 
 _atom_site_aniso_U_12 
Au 0.0243(7) 0.0243(7) 0.0165(7) 0.0013(5) 0.0013(5) -0.0047(6) 
In 0.0204(13) 0.0204(13) 0.0171(15) 0.000 0.000 0.0003(16) 
Rb 0.021(2) 0.021(2) 0.182(18) 0.000 0.000 0.000 
  
_geom_special_details 
; 
 All esds (except the esd in the dihedral angle between two l.s. planes) 
 are estimated using the full covariance matrix.  The cell esds are taken 
 into account individually in the estimation of esds in distances, angles 
 and torsion angles; correlations between esds in cell parameters are only 
 used when they are defined by crystal symmetry.  An approximate (isotropic) 
 treatment of cell esds is used for estimating esds involving l.s. planes. 
; 
  
loop_ 
 _geom_bond_atom_site_label_1 
 _geom_bond_atom_site_label_2 
 _geom_bond_distance 
 _geom_bond_site_symmetry_2 
 _geom_bond_publ_flag 
Au Au 2.739(3) 18_556 ? 
Au In 2.7707(14) . ? 
Au Au 2.820(3) 25_565 ? 
Au In 2.927(3) 25_565 ? 
Au In 2.930(2) 27_455 ? 
Au In 2.930(2) 11 ? 
Au Au 3.027(2) 27_455 ? 
Au Au 3.027(2) 28 ? 
Au Rb 3.4272(7) 25 ? 
Au Rb 3.4272(7) 1_565 ? 
In Au 2.7707(14) 18 ? 
In Au 2.927(3) 25_565 ? 
In Au 2.927(3) 10_564 ? 
In Au 2.930(2) 12_454 ? 
In Au 2.930(2) 11_554 ? 
In Au 2.930(2) 27_455 ? 
In Au 2.930(2) 28 ? 
In Rb 3.9863(14) 25 ? 
In Rb 3.9863(14) 1_565 ? 
In Rb 3.9863(14) 9_554 ? 
In Rb 3.9863(14) 17_565 ? 
Rb Au 3.4272(7) 3_655 ? 
Rb Au 3.4272(7) 28_545 ? 
Rb Au 3.4272(7) 4_455 ? 
Rb Au 3.4272(7) 27_455 ? 
Rb Au 3.4272(7) 26_445 ? 
Rb Au 3.4272(7) 25 ? 
Rb Au 3.4272(7) 2_565 ? 
Rb Au 3.4272(7) 1_545 ? 
Rb In 3.9863(14) 19_455 ? 
Rb In 3.9863(14) 27_455 ? 
Rb In 3.9863(14) 25 ? 
Rb In 3.9863(14) 1_545 ? 
  
loop_ 
 _geom_angle_atom_site_label_1 
 _geom_angle_atom_site_label_2 
 _geom_angle_atom_site_label_3 
 _geom_angle 
 _geom_angle_site_symmetry_1 
 _geom_angle_site_symmetry_3 
 _geom_angle_publ_flag 
Au Au In 177.16(10) 18_556 . ? 
Au Au Au 119.71(6) 18_556 25_565 ? 
In Au Au 63.13(9) . 25_565 ? 
Au Au In 62.10(4) 18_556 25_565 ? 
In Au In 120.74(8) . 25_565 ? 
Au Au In 57.61(5) 25_565 25_565 ? 
Au Au In 62.13(3) 18_556 27_455 ? 
In Au In 115.77(6) . 27_455 ? 
Au Au In 142.61(7) 25_565 27_455 ? 
In Au In 110.74(6) 25_565 27_455 ? 
Au Au In 62.13(3) 18_556 11 ? 
In Au In 115.77(6) . 11 ? 
Au Au In 142.61(7) 25_565 11 ? 
In Au In 110.74(6) 25_565 11 ? 
In Au In 73.92(14) 27_455 11 ? 
Au Au Au 117.50(4) 18_556 27_455 ? 
In Au Au 60.51(7) . 27_455 ? 
Au Au Au 108.42(7) 25_565 27_455 ? 
In Au Au 140.387(9) 25_565 27_455 ? 
In Au Au 55.40(4) 27_455 27_455 ? 
In Au Au 100.75(6) 11 27_455 ? 
Au Au Au 117.50(4) 18_556 28 ? 
In Au Au 60.51(7) . 28 ? 
Au Au Au 108.42(7) 25_565 28 ? 
In Au Au 140.387(9) 25_565 28 ? 
In Au Au 100.75(6) 27_455 28 ? 
In Au Au 55.40(4) 11 28 ? 
Au Au Au 77.69(4) 27_455 28 ? 
Au Au Rb 101.77(2) 18_556 25 ? 
In Au Rb 79.28(4) . 25 ? 
Au Au Rb 65.70(2) 25_565 25 ? 
In Au Rb 77.27(3) 25_565 25 ? 
In Au Rb 77.23(6) 27_455 25 ? 
In Au Rb 151.04(8) 11 25 ? 
Au Au Rb 63.79(2) 27_455 25 ? 
Au Au Rb 134.56(5) 28 25 ? 
Au Au Rb 101.77(2) 18_556 1_565 ? 
In Au Rb 79.28(4) . 1_565 ? 
Au Au Rb 65.70(2) 25_565 1_565 ? 
In Au Rb 77.27(3) 25_565 1_565 ? 
In Au Rb 151.04(8) 27_455 1_565 ? 
In Au Rb 77.23(6) 11 1_565 ? 
Au Au Rb 134.56(5) 27_455 1_565 ? 
Au Au Rb 63.79(2) 28 1_565 ? 
Rb Au Rb 131.41(4) 25 1_565 ? 
Au In Au 174.3(2) . 18 ? 
Au In Au 59.26(8) . 25_565 ? 
Au In Au 115.06(13) 18 25_565 ? 
Au In Au 115.06(13) . 10_564 ? 
Au In Au 59.26(8) 18 10_564 ? 
Au In Au 55.79(8) 25_565 10_564 ? 
Au In Au 119.78(8) . 12_454 ? 
Au In Au 64.08(6) 18 12_454 ? 
Au In Au 138.60(7) 25_565 12_454 ? 
Au In Au 108.22(5) 10_564 12_454 ? 
Au In Au 119.78(8) . 11_554 ? 
Au In Au 64.08(6) 18 11_554 ? 
Au In Au 138.60(7) 25_565 11_554 ? 
Au In Au 108.22(5) 10_564 11_554 ? 
Au In Au 80.79(11) 12_454 11_554 ? 
Au In Au 64.08(6) . 27_455 ? 
Au In Au 119.78(8) 18 27_455 ? 
Au In Au 108.22(5) 25_565 27_455 ? 
Au In Au 138.60(7) 10_564 27_455 ? 
Au In Au 55.74(7) 12_454 27_455 ? 
Au In Au 106.08(14) 11_554 27_455 ? 
Au In Au 64.08(6) . 28 ? 
Au In Au 119.78(8) 18 28 ? 
Au In Au 108.22(5) 25_565 28 ? 
Au In Au 138.60(7) 10_564 28 ? 
Au In Au 106.08(14) 12_454 28 ? 
Au In Au 55.74(7) 11_554 28 ? 
Au In Au 80.79(11) 27_455 28 ? 
Au In Rb 57.64(3) . 25 ? 
Au In Rb 120.09(6) 18 25 ? 
Au In Rb 56.99(4) 25_565 25 ? 
Au In Rb 86.61(7) 10_564 25 ? 
Au In Rb 86.57(3) 12_454 25 ? 
Au In Rb 162.90(12) 11_554 25 ? 
Au In Rb 56.98(2) 27_455 25 ? 
Au In Rb 118.08(4) 28 25 ? 
Au In Rb 57.64(3) . 1_565 ? 
Au In Rb 120.09(6) 18 1_565 ? 
Au In Rb 56.99(4) 25_565 1_565 ? 
Au In Rb 86.61(7) 10_564 1_565 ? 
Au In Rb 162.90(12) 12_454 1_565 ? 
Au In Rb 86.57(3) 11_554 1_565 ? 
Au In Rb 118.08(4) 27_455 1_565 ? 
Au In Rb 56.98(2) 28 1_565 ? 
Rb In Rb 103.18(5) 25 1_565 ? 
Au In Rb 120.09(6) . 9_554 ? 
Au In Rb 57.64(3) 18 9_554 ? 
Au In Rb 86.61(7) 25_565 9_554 ? 
Au In Rb 56.99(4) 10_564 9_554 ? 
Au In Rb 56.98(2) 12_454 9_554 ? 
Au In Rb 118.08(4) 11_554 9_554 ? 
Au In Rb 86.57(3) 27_455 9_554 ? 
Au In Rb 162.90(12) 28 9_554 ? 
Rb In Rb 62.51(3) 25 9_554 ? 
Rb In Rb 140.04(11) 1_565 9_554 ? 
Au In Rb 120.09(6) . 17_565 ? 
Au In Rb 57.64(3) 18 17_565 ? 
Au In Rb 86.61(7) 25_565 17_565 ? 
Au In Rb 56.99(4) 10_564 17_565 ? 
Au In Rb 118.08(4) 12_454 17_565 ? 
Au In Rb 56.98(2) 11_554 17_565 ? 
Au In Rb 162.90(12) 27_455 17_565 ? 
Au In Rb 86.57(3) 28 17_565 ? 
Rb In Rb 140.04(11) 25 17_565 ? 
Rb In Rb 62.51(3) 1_565 17_565 ? 
Rb In Rb 103.18(5) 9_554 17_565 ? 
Au Rb Au 138.12(5) 3_655 28_545 ? 
Au Rb Au 156.47(4) 3_655 4_455 ? 
Au Rb Au 48.59(4) 28_545 4_455 ? 
Au Rb Au 48.59(4) 3_655 27_455 ? 
Au Rb Au 156.47(4) 28_545 27_455 ? 
Au Rb Au 138.12(5) 4_455 27_455 ? 
Au Rb Au 133.87(5) 3_655 26_445 ? 
Au Rb Au 87.617(8) 28_545 26_445 ? 
Au Rb Au 52.42(5) 4_455 26_445 ? 
Au Rb Au 87.617(8) 27_455 26_445 ? 
Au Rb Au 52.42(5) 3_655 25 ? 
Au Rb Au 87.617(8) 28_545 25 ? 
Au Rb Au 133.87(5) 4_455 25 ? 
Au Rb Au 87.617(8) 27_455 25 ? 
Au Rb Au 156.47(4) 26_445 25 ? 
Au Rb Au 87.617(8) 3_655 2_565 ? 
Au Rb Au 133.87(5) 28_545 2_565 ? 
Au Rb Au 87.617(8) 4_455 2_565 ? 
Au Rb Au 52.42(5) 27_455 2_565 ? 
Au Rb Au 48.59(4) 26_445 2_565 ? 
Au Rb Au 138.12(5) 25 2_565 ? 
Au Rb Au 87.617(8) 3_655 1_545 ? 
Au Rb Au 52.42(5) 28_545 1_545 ? 
Au Rb Au 87.617(8) 4_455 1_545 ? 
Au Rb Au 133.87(5) 27_455 1_545 ? 
Au Rb Au 138.12(5) 26_445 1_545 ? 
Au Rb Au 48.59(4) 25 1_545 ? 
Au Rb Au 156.47(4) 2_565 1_545 ? 
Au Rb In 160.41(2) 3_655 19_455 ? 
Au Rb In 45.74(5) 28_545 19_455 ? 
Au Rb In 43.07(2) 4_455 19_455 ? 
Au Rb In 119.10(4) 27_455 19_455 ? 
Au Rb In 45.79(5) 26_445 19_455 ? 
Au Rb In 119.05(5) 25 19_455 ? 
Au Rb In 94.27(6) 2_565 19_455 ? 
Au Rb In 97.89(6) 1_545 19_455 ? 
Au Rb In 45.74(5) 3_655 27_455 ? 
Au Rb In 160.41(2) 28_545 27_455 ? 
Au Rb In 119.10(4) 4_455 27_455 ? 
Au Rb In 43.07(2) 27_455 27_455 ? 
Au Rb In 94.27(6) 26_445 27_455 ? 
Au Rb In 97.89(6) 25 27_455 ? 
Au Rb In 45.79(5) 2_565 27_455 ? 
Au Rb In 119.05(5) 1_545 27_455 ? 
In Rb In 140.04(11) 19_455 27_455 ? 
Au Rb In 45.79(5) 3_655 25 ? 
Au Rb In 97.89(6) 28_545 25 ? 
Au Rb In 119.05(5) 4_455 25 ? 
Au Rb In 94.27(6) 27_455 25 ? 
Au Rb In 160.41(2) 26_445 25 ? 
Au Rb In 43.07(2) 25 25 ? 
Au Rb In 119.10(4) 2_565 25 ? 
Au Rb In 45.74(5) 1_545 25 ? 
In Rb In 143.58(10) 19_455 25 ? 
In Rb In 74.381(12) 27_455 25 ? 
Au Rb In 97.89(6) 3_655 1_545 ? 
Au Rb In 45.79(5) 28_545 1_545 ? 
Au Rb In 94.27(6) 4_455 1_545 ? 
Au Rb In 119.05(5) 27_455 1_545 ? 
Au Rb In 119.10(4) 26_445 1_545 ? 
Au Rb In 45.74(5) 25 1_545 ? 
Au Rb In 160.41(2) 2_565 1_545 ? 
Au Rb In 43.07(2) 1_545 1_545 ? 
In Rb In 74.381(13) 19_455 1_545 ? 
In Rb In 143.58(10) 27_455 1_545 ? 
In Rb In 76.82(5) 25 1_545 ? 
  
_diffrn_measured_fraction_theta_max    0.981 
_diffrn_reflns_theta_full              25.00 
_diffrn_measured_fraction_theta_full   1.000 
_refine_diff_density_max    6.000 
_refine_diff_density_min   -3.089 
_refine_diff_density_rms    1.309 
#===END

  
data_K0.65Rb0.35Au4In2
  
_audit_creation_method            SHELXL-97 
_chemical_name_systematic 
; 
 ? 
; 
_chemical_name_common             ? 
_chemical_melting_point           ? 
_chemical_formula_moiety          ? 
_chemical_formula_sum 
 'Au4 In2 K0.65 Rb0.35' 
_chemical_formula_weight          1072.84 
  
loop_ 
 _atom_type_symbol 
 _atom_type_description 
 _atom_type_scat_dispersion_real 
 _atom_type_scat_dispersion_imag 
 _atom_type_scat_source 
 'K'  'K'   0.2009   0.2494 
 'International Tables Vol C Tables 4.2.6.8 and 6.1.1.4' 
 'Rb'  'Rb'  -0.9393   2.9676 
 'International Tables Vol C Tables 4.2.6.8 and 6.1.1.4' 
 'In'  'In'  -0.7276   1.3100 
 'International Tables Vol C Tables 4.2.6.8 and 6.1.1.4' 
 'Au'  'Au'  -2.0133   8.8022 
 'International Tables Vol C Tables 4.2.6.8 and 6.1.1.4' 
  
_symmetry_cell_setting            Tetragonal 
_symmetry_space_group_name_H-M    I4/mcm 
  
loop_ 
 _symmetry_equiv_pos_as_xyz 
 'x, y, z' 
 '-x, -y, z' 
 '-y, x, z' 
 'y, -x, z' 
 '-x, y, -z+1/2' 
 'x, -y, -z+1/2' 
 'y, x, -z+1/2' 
 '-y, -x, -z+1/2' 
 'x+1/2, y+1/2, z+1/2' 
 '-x+1/2, -y+1/2, z+1/2' 
 '-y+1/2, x+1/2, z+1/2' 
 'y+1/2, -x+1/2, z+1/2' 
 '-x+1/2, y+1/2, -z+1' 
 'x+1/2, -y+1/2, -z+1' 
 'y+1/2, x+1/2, -z+1' 
 '-y+1/2, -x+1/2, -z+1' 
 '-x, -y, -z' 
 'x, y, -z' 
 'y, -x, -z' 
 '-y, x, -z' 
 'x, -y, z-1/2' 
 '-x, y, z-1/2' 
 '-y, -x, z-1/2' 
 'y, x, z-1/2' 
 '-x+1/2, -y+1/2, -z+1/2' 
 'x+1/2, y+1/2, -z+1/2' 
 'y+1/2, -x+1/2, -z+1/2' 
 '-y+1/2, x+1/2, -z+1/2' 
 'x+1/2, -y+1/2, z' 
 '-x+1/2, y+1/2, z' 
 '-y+1/2, -x+1/2, z' 
 'y+1/2, x+1/2, z' 
  
_cell_length_a                    8.7852(12) 
_cell_length_b                    8.7852(12) 
_cell_length_c                    8.3259(17) 
_cell_angle_alpha                 90.00 
_cell_angle_beta                  90.00 
_cell_angle_gamma                 90.00 
_cell_volume                      642.59(18) 
_cell_formula_units_Z             4 
_cell_measurement_temperature     293(2) 
_cell_measurement_reflns_used     ? 
_cell_measurement_theta_min       5 
_cell_measurement_theta_max       28 
  
_exptl_crystal_description        irregular
_exptl_crystal_colour             "copper metallic luster"
_exptl_crystal_size_max           0.21 
_exptl_crystal_size_mid           0.17 
_exptl_crystal_size_min           0.15 
_exptl_crystal_density_meas       ? 
_exptl_crystal_density_diffrn     11.089 
_exptl_crystal_density_method     'not measured' 
_exptl_crystal_F_000              1757 
_exptl_absorpt_coefficient_mu     100.952 
_exptl_absorpt_correction_type    numerical 
_exptl_absorpt_correction_T_min   ? 
_exptl_absorpt_correction_T_max   ? 
_exptl_absorpt_process_details    ? 
  
_exptl_special_details 
; 
 ? 
; 
  
_diffrn_ambient_temperature       293(2) 
_diffrn_radiation_wavelength      0.71073 
_diffrn_radiation_type            MoK\a 
_diffrn_radiation_source          'fine-focus sealed tube' 
_diffrn_radiation_monochromator   graphite 
_diffrn_measurement_device_type   'Bruker P4' 
_diffrn_measurement_method        '\w scans' 
_diffrn_detector_area_resol_mean  ? 
_diffrn_standards_number          ? 
_diffrn_standards_interval_count  ? 
_diffrn_standards_interval_time   ? 
_diffrn_standards_decay_%         ? 
_diffrn_reflns_number             421 
_diffrn_reflns_av_R_equivalents   0.0565 
_diffrn_reflns_av_sigmaI/netI     0.0528 
_diffrn_reflns_limit_h_min        -7 
_diffrn_reflns_limit_h_max        8 
_diffrn_reflns_limit_k_min        0 
_diffrn_reflns_limit_k_max        11 
_diffrn_reflns_limit_l_min        0 
_diffrn_reflns_limit_l_max        11 
_diffrn_reflns_theta_min          3.28 
_diffrn_reflns_theta_max          28.65 
_reflns_number_total              245 
_reflns_number_gt                 173 
_reflns_threshold_expression      >2sigma(I) 
  
_computing_data_collection        'Bruker XSCANS' 
_computing_cell_refinement        'Bruker XSCANS' 
_computing_data_reduction         'Bruker SHELXTL' 
_computing_structure_solution     'SHELXS-97 (Sheldrick, 1990)' 
_computing_structure_refinement   'SHELXL-97 (Sheldrick, 1997)' 
_computing_molecular_graphics     'Bruker SHELXTL' 
_computing_publication_material   'Bruker SHELXTL' 
  
_refine_special_details 
; 
 Refinement of F^2^ against ALL reflections.  The weighted R-factor wR and 
 goodness of fit S are based on F^2^, conventional R-factors R are based 
 on F, with F set to zero for negative F^2^. The threshold expression of 
 F^2^ > 2sigma(F^2^) is used only for calculating R-factors(gt) etc. and is 
 not relevant to the choice of reflections for refinement.  R-factors based 
 on F^2^ are statistically about twice as large as those based on F, and R- 
 factors based on ALL data will be even larger. 
; 
  
_refine_ls_structure_factor_coef  Fsqd 
_refine_ls_matrix_type            full 
_refine_ls_weighting_scheme       calc 
_refine_ls_weighting_details 
 'calc w=1/[\s^2^(Fo^2^)+(0.0569P)^2^+0.0000P] where P=(Fo^2^+2Fc^2^)/3' 
_atom_sites_solution_primary      direct 
_atom_sites_solution_secondary    difmap 
_atom_sites_solution_hydrogens    geom 
_refine_ls_hydrogen_treatment     mixed 
_refine_ls_extinction_method      SHELXL 
_refine_ls_extinction_coef        0.00074(15) 
_refine_ls_extinction_expression 
 'Fc^*^=kFc[1+0.001xFc^2^\l^3^/sin(2\q)]^-1/4^' 
_refine_ls_number_reflns          245 
_refine_ls_number_parameters      15 
_refine_ls_number_restraints      0 
_refine_ls_R_factor_all           0.0735 
_refine_ls_R_factor_gt            0.0479 
_refine_ls_wR_factor_ref          0.1226 
_refine_ls_wR_factor_gt           0.1128 
_refine_ls_goodness_of_fit_ref    1.094 
_refine_ls_restrained_S_all       1.094 
_refine_ls_shift/su_max           0.000 
_refine_ls_shift/su_mean          0.000 
  
loop_ 
 _atom_site_label 
 _atom_site_type_symbol 
 _atom_site_fract_x 
 _atom_site_fract_y 
 _atom_site_fract_z 
 _atom_site_U_iso_or_equiv 
 _atom_site_adp_type 
 _atom_site_occupancy 
 _atom_site_symmetry_multiplicity 
 _atom_site_calc_flag 
 _atom_site_refinement_flags 
 _atom_site_disorder_assembly 
 _atom_site_disorder_group 
Au Au 0.15156(10) 0.65156(10) 0.33463(12) 0.0215(6) Uani 1 2 d S . . 
In In 0.1417(3) 0.6417(3) 0.0000 0.0197(7) Uani 1 4 d S . . 
K K 0.0000 0.0000 0.2500 0.059(7) Uani 0.65(9) 8 d SP . . 
Rb Rb 0.0000 0.0000 0.2500 0.059(7) Uani 0.35(9) 8 d SP . . 
  
loop_ 
 _atom_site_aniso_label 
 _atom_site_aniso_U_11 
 _atom_site_aniso_U_22 
 _atom_site_aniso_U_33 
 _atom_site_aniso_U_23 
 _atom_site_aniso_U_13 
 _atom_site_aniso_U_12 
Au 0.0238(6) 0.0238(6) 0.0168(7) 0.0010(4) 0.0010(4) -0.0041(5) 
In 0.0214(10) 0.0214(10) 0.0163(13) 0.000 0.000 -0.0016(13) 
K 0.016(4) 0.016(4) 0.145(19) 0.000 0.000 0.000 
Rb 0.016(4) 0.016(4) 0.145(19) 0.000 0.000 0.000 
  
_geom_special_details 
; 
 All esds (except the esd in the dihedral angle between two l.s. planes) 
 are estimated using the full covariance matrix.  The cell esds are taken 
 into account individually in the estimation of esds in distances, angles 
 and torsion angles; correlations between esds in cell parameters are only 
 used when they are defined by crystal symmetry.  An approximate (isotropic) 
 treatment of cell esds is used for estimating esds involving l.s. planes. 
; 
  
loop_ 
 _geom_bond_atom_site_label_1 
 _geom_bond_atom_site_label_2 
 _geom_bond_distance 
 _geom_bond_site_symmetry_2 
 _geom_bond_publ_flag 
Au Au 2.754(2) 18_556 ? 
Au In 2.7888(12) . ? 
Au Au 2.823(2) 25_565 ? 
Au In 2.914(3) 25_565 ? 
Au In 2.923(2) 27_455 ? 
Au In 2.923(2) 11 ? 
Au Au 3.0129(19) 28 ? 
Au Au 3.0129(19) 27_455 ? 
Au Rb 3.4117(7) 25 ? 
Au K 3.4117(7) 25 ? 
Au K 3.4117(6) 1_565 ? 
Au Rb 3.4117(6) 1_565 ? 
In Au 2.7888(12) 18 ? 
In Au 2.914(3) 25_565 ? 
In Au 2.914(3) 10_564 ? 
In Au 2.923(2) 11_554 ? 
In Au 2.923(2) 12_454 ? 
In Au 2.923(2) 28 ? 
In Au 2.923(2) 27_455 ? 
In Rb 3.9735(12) 25 ? 
In K 3.9735(12) 25 ? 
In K 3.9735(12) 1_565 ? 
In Rb 3.9735(12) 1_565 ? 
K Au 3.4117(7) 28_545 ? 
K Au 3.4117(6) 3_655 ? 
K Au 3.4117(7) 26_445 ? 
K Au 3.4117(6) 27_455 ? 
K Au 3.4117(7) 4_455 ? 
K Au 3.4117(6) 1_545 ? 
K Au 3.4117(7) 2_565 ? 
K Au 3.4117(7) 25 ? 
K In 3.9735(12) 19_455 ? 
K In 3.9735(12) 27_455 ? 
K In 3.9735(12) 25 ? 
K In 3.9735(12) 1_545 ? 
  
loop_ 
 _geom_angle_atom_site_label_1 
 _geom_angle_atom_site_label_2 
 _geom_angle_atom_site_label_3 
 _geom_angle 
 _geom_angle_site_symmetry_1 
 _geom_angle_site_symmetry_3 
 _geom_angle_publ_flag 
Au Au In 177.49(8) 18_556 . ? 
Au Au Au 119.95(4) 18_556 25_565 ? 
In Au Au 62.56(8) . 25_565 ? 
Au Au In 61.80(3) 18_556 25_565 ? 
In Au In 120.70(6) . 25_565 ? 
Au Au In 58.15(5) 25_565 25_565 ? 
Au Au In 61.90(3) 18_556 27_455 ? 
In Au In 116.26(5) . 27_455 ? 
Au Au In 142.50(6) 25_565 27_455 ? 
In Au In 110.19(5) 25_565 27_455 ? 
Au Au In 61.90(3) 18_556 11 ? 
In Au In 116.26(5) . 11 ? 
Au Au In 142.50(6) 25_565 11 ? 
In Au In 110.19(5) 25_565 11 ? 
In Au In 74.10(11) 27_455 11 ? 
Au Au Au 117.89(4) 18_556 28 ? 
In Au Au 60.35(6) . 28 ? 
Au Au Au 107.94(5) 25_565 28 ? 
In Au Au 140.519(7) 25_565 28 ? 
In Au Au 101.20(5) 27_455 28 ? 
In Au Au 56.02(3) 11 28 ? 
Au Au Au 117.89(4) 18_556 27_455 ? 
In Au Au 60.35(6) . 27_455 ? 
Au Au Au 107.94(5) 25_565 27_455 ? 
In Au Au 140.519(7) 25_565 27_455 ? 
In Au Au 56.02(3) 27_455 27_455 ? 
In Au Au 101.20(5) 11 27_455 ? 
Au Au Au 77.36(3) 28 27_455 ? 
Au Au Rb 101.920(17) 18_556 25 ? 
In Au Rb 79.01(3) . 25 ? 
Au Au Rb 65.561(17) 25_565 25 ? 
In Au Rb 77.39(2) 25_565 25 ? 
In Au Rb 77.27(5) 27_455 25 ? 
In Au Rb 151.26(6) 11 25 ? 
Au Au Rb 134.14(4) 28 25 ? 
Au Au Rb 63.797(19) 27_455 25 ? 
Au Au K 101.920(17) 18_556 25 ? 
In Au K 79.01(3) . 25 ? 
Au Au K 65.561(17) 25_565 25 ? 
In Au K 77.39(2) 25_565 25 ? 
In Au K 77.27(5) 27_455 25 ? 
In Au K 151.26(6) 11 25 ? 
Au Au K 134.14(4) 28 25 ? 
Au Au K 63.797(19) 27_455 25 ? 
Rb Au K 0.0 25 25 ? 
Au Au K 101.920(17) 18_556 1_565 ? 
In Au K 79.01(3) . 1_565 ? 
Au Au K 65.561(17) 25_565 1_565 ? 
In Au K 77.39(2) 25_565 1_565 ? 
In Au K 151.26(6) 27_455 1_565 ? 
In Au K 77.27(5) 11 1_565 ? 
Au Au K 63.80(2) 28 1_565 ? 
Au Au K 134.14(4) 27_455 1_565 ? 
Rb Au K 131.12(3) 25 1_565 ? 
K Au K 131.12(3) 25 1_565 ? 
Au Au Rb 101.920(17) 18_556 1_565 ? 
In Au Rb 79.01(3) . 1_565 ? 
Au Au Rb 65.561(17) 25_565 1_565 ? 
In Au Rb 77.39(2) 25_565 1_565 ? 
In Au Rb 151.26(6) 27_455 1_565 ? 
In Au Rb 77.27(5) 11 1_565 ? 
Au Au Rb 63.80(2) 28 1_565 ? 
Au Au Rb 134.14(4) 27_455 1_565 ? 
Rb Au Rb 131.12(3) 25 1_565 ? 
K Au Rb 131.12(3) 25 1_565 ? 
K Au Rb 0.0 1_565 1_565 ? 
Au In Au 174.99(15) . 18 ? 
Au In Au 59.30(6) . 25_565 ? 
Au In Au 115.69(10) 18 25_565 ? 
Au In Au 115.69(10) . 10_564 ? 
Au In Au 59.30(6) 18 10_564 ? 
Au In Au 56.40(7) 25_565 10_564 ? 
Au In Au 119.80(7) . 11_554 ? 
Au In Au 63.62(4) 18 11_554 ? 
Au In Au 138.90(5) 25_565 11_554 ? 
Au In Au 107.97(4) 10_564 11_554 ? 
Au In Au 119.80(7) . 12_454 ? 
Au In Au 63.62(4) 18 12_454 ? 
Au In Au 138.90(5) 25_565 12_454 ? 
Au In Au 107.97(4) 10_564 12_454 ? 
Au In Au 80.22(8) 11_554 12_454 ? 
Au In Au 63.62(4) . 28 ? 
Au In Au 119.80(7) 18 28 ? 
Au In Au 107.97(4) 25_565 28 ? 
Au In Au 138.90(5) 10_564 28 ? 
Au In Au 56.21(5) 11_554 28 ? 
Au In Au 105.90(11) 12_454 28 ? 
Au In Au 63.62(4) . 27_455 ? 
Au In Au 119.80(7) 18 27_455 ? 
Au In Au 107.97(4) 25_565 27_455 ? 
Au In Au 138.90(5) 10_564 27_455 ? 
Au In Au 105.90(11) 11_554 27_455 ? 
Au In Au 56.21(5) 12_454 27_455 ? 
Au In Au 80.22(8) 28 27_455 ? 
Au In Rb 57.44(2) . 25 ? 
Au In Rb 120.57(4) 18 25 ? 
Au In Rb 56.92(3) 25_565 25 ? 
Au In Rb 87.09(6) 10_564 25 ? 
Au In Rb 162.61(10) 11_554 25 ? 
Au In Rb 86.97(2) 12_454 25 ? 
Au In Rb 117.44(3) 28 25 ? 
Au In Rb 56.879(17) 27_455 25 ? 
Au In K 57.44(2) . 25 ? 
Au In K 120.57(4) 18 25 ? 
Au In K 56.92(3) 25_565 25 ? 
Au In K 87.09(6) 10_564 25 ? 
Au In K 162.61(10) 11_554 25 ? 
Au In K 86.97(2) 12_454 25 ? 
Au In K 117.44(3) 28 25 ? 
Au In K 56.879(17) 27_455 25 ? 
Rb In K 0.0 25 25 ? 
Au In K 57.44(2) . 1_565 ? 
Au In K 120.57(4) 18 1_565 ? 
Au In K 56.92(3) 25_565 1_565 ? 
Au In K 87.09(6) 10_564 1_565 ? 
Au In K 86.97(2) 11_554 1_565 ? 
Au In K 162.61(10) 12_454 1_565 ? 
Au In K 56.879(17) 28 1_565 ? 
Au In K 117.44(3) 27_455 1_565 ? 
Rb In K 102.83(4) 25 1_565 ? 
K In K 102.83(4) 25 1_565 ? 
Au In Rb 57.44(2) . 1_565 ? 
Au In Rb 120.57(4) 18 1_565 ? 
Au In Rb 56.92(3) 25_565 1_565 ? 
Au In Rb 87.09(6) 10_564 1_565 ? 
Au In Rb 86.97(2) 11_554 1_565 ? 
Au In Rb 162.61(10) 12_454 1_565 ? 
Au In Rb 56.879(17) 28 1_565 ? 
Au In Rb 117.44(3) 27_455 1_565 ? 
Rb In Rb 102.83(4) 25 1_565 ? 
K In Rb 102.83(4) 25 1_565 ? 
K In Rb 0.0 1_565 1_565 ? 
Au K Au 137.99(4) 28_545 3_655 ? 
Au K Au 87.555(7) 28_545 26_445 ? 
Au K Au 134.06(4) 3_655 26_445 ? 
Au K Au 156.16(3) 28_545 27_455 ? 
Au K Au 48.88(3) 3_655 27_455 ? 
Au K Au 87.555(7) 26_445 27_455 ? 
Au K Au 48.88(3) 28_545 4_455 ? 
Au K Au 156.16(3) 3_655 4_455 ? 
Au K Au 52.41(4) 26_445 4_455 ? 
Au K Au 137.99(4) 27_455 4_455 ? 
Au K Au 52.41(4) 28_545 1_545 ? 
Au K Au 87.555(7) 3_655 1_545 ? 
Au K Au 137.99(4) 26_445 1_545 ? 
Au K Au 134.06(4) 27_455 1_545 ? 
Au K Au 87.555(7) 4_455 1_545 ? 
Au K Au 134.06(4) 28_545 2_565 ? 
Au K Au 87.555(7) 3_655 2_565 ? 
Au K Au 48.88(3) 26_445 2_565 ? 
Au K Au 52.41(4) 27_455 2_565 ? 
Au K Au 87.555(7) 4_455 2_565 ? 
Au K Au 156.16(3) 1_545 2_565 ? 
Au K Au 87.555(7) 28_545 25 ? 
Au K Au 52.41(4) 3_655 25 ? 
Au K Au 156.16(3) 26_445 25 ? 
Au K Au 87.555(7) 27_455 25 ? 
Au K Au 134.06(4) 4_455 25 ? 
Au K Au 48.88(3) 1_545 25 ? 
Au K Au 137.99(4) 2_565 25 ? 
Au K In 45.69(4) 28_545 19_455 ? 
Au K In 160.250(18) 3_655 19_455 ? 
Au K In 45.85(4) 26_445 19_455 ? 
Au K In 118.82(3) 27_455 19_455 ? 
Au K In 43.55(2) 4_455 19_455 ? 
Au K In 97.82(5) 1_545 19_455 ? 
Au K In 94.60(5) 2_565 19_455 ? 
Au K In 118.70(4) 25 19_455 ? 
Au K In 160.250(18) 28_545 27_455 ? 
Au K In 45.69(4) 3_655 27_455 ? 
Au K In 94.60(5) 26_445 27_455 ? 
Au K In 43.55(2) 27_455 27_455 ? 
Au K In 118.82(3) 4_455 27_455 ? 
Au K In 118.70(4) 1_545 27_455 ? 
Au K In 45.85(4) 2_565 27_455 ? 
Au K In 97.82(5) 25 27_455 ? 
In K In 140.43(9) 19_455 27_455 ? 
Au K In 97.82(5) 28_545 25 ? 
Au K In 45.85(4) 3_655 25 ? 
Au K In 160.250(18) 26_445 25 ? 
Au K In 94.60(5) 27_455 25 ? 
Au K In 118.70(4) 4_455 25 ? 
Au K In 45.69(4) 1_545 25 ? 
Au K In 118.82(3) 2_565 25 ? 
Au K In 43.55(2) 25 25 ? 
In K In 143.47(8) 19_455 25 ? 
In K In 74.074(11) 27_455 25 ? 
Au K In 45.85(4) 28_545 1_545 ? 
Au K In 97.82(5) 3_655 1_545 ? 
Au K In 118.82(3) 26_445 1_545 ? 
Au K In 118.70(4) 27_455 1_545 ? 
Au K In 94.60(5) 4_455 1_545 ? 
Au K In 43.55(2) 1_545 1_545 ? 
Au K In 160.250(18) 2_565 1_545 ? 
Au K In 45.69(4) 25 1_545 ? 
In K In 74.074(11) 19_455 1_545 ? 
In K In 143.47(8) 27_455 1_545 ? 
In K In 77.17(4) 25 1_545 ? 
  
_diffrn_measured_fraction_theta_max    1.000 
_diffrn_reflns_theta_full              25.00 
_diffrn_measured_fraction_theta_full   1.000 
_refine_diff_density_max    4.023 
_refine_diff_density_min   -2.395 
_refine_diff_density_rms    0.736 
#===END

  
data_K0.87Rb0.13Au4In2 
  
_audit_creation_method            SHELXL-97 
_chemical_name_systematic 
; 
 ? 
; 
_chemical_name_common             ? 
_chemical_melting_point           ? 
_chemical_formula_moiety          ? 
_chemical_formula_sum 
 'Au4 In2 K0.87 Rb0.13' 
_chemical_formula_weight          1062.63 
  
loop_ 
 _atom_type_symbol 
 _atom_type_description 
 _atom_type_scat_dispersion_real 
 _atom_type_scat_dispersion_imag 
 _atom_type_scat_source 
 'K'  'K'   0.2009   0.2494 
 'International Tables Vol C Tables 4.2.6.8 and 6.1.1.4' 
 'Rb'  'Rb'  -0.9393   2.9676 
 'International Tables Vol C Tables 4.2.6.8 and 6.1.1.4' 
 'In'  'In'  -0.7276   1.3100 
 'International Tables Vol C Tables 4.2.6.8 and 6.1.1.4' 
 'Au'  'Au'  -2.0133   8.8022 
 'International Tables Vol C Tables 4.2.6.8 and 6.1.1.4' 
  
_symmetry_cell_setting            Tetragonal 
_symmetry_space_group_name_H-M    I4/mcm 
  
loop_ 
 _symmetry_equiv_pos_as_xyz 
 'x, y, z' 
 '-x, -y, z' 
 '-y, x, z' 
 'y, -x, z' 
 '-x, y, -z+1/2' 
 'x, -y, -z+1/2' 
 'y, x, -z+1/2' 
 '-y, -x, -z+1/2' 
 'x+1/2, y+1/2, z+1/2' 
 '-x+1/2, -y+1/2, z+1/2' 
 '-y+1/2, x+1/2, z+1/2' 
 'y+1/2, -x+1/2, z+1/2' 
 '-x+1/2, y+1/2, -z+1' 
 'x+1/2, -y+1/2, -z+1' 
 'y+1/2, x+1/2, -z+1' 
 '-y+1/2, -x+1/2, -z+1' 
 '-x, -y, -z' 
 'x, y, -z' 
 'y, -x, -z' 
 '-y, x, -z' 
 'x, -y, z-1/2' 
 '-x, y, z-1/2' 
 '-y, -x, z-1/2' 
 'y, x, z-1/2' 
 '-x+1/2, -y+1/2, -z+1/2' 
 'x+1/2, y+1/2, -z+1/2' 
 'y+1/2, -x+1/2, -z+1/2' 
 '-y+1/2, x+1/2, -z+1/2' 
 'x+1/2, -y+1/2, z' 
 '-x+1/2, y+1/2, z' 
 '-y+1/2, -x+1/2, z' 
 'y+1/2, x+1/2, z' 
  
_cell_length_a                    8.7032(12) 
_cell_length_b                    8.7032(12) 
_cell_length_c                    8.3370(17) 
_cell_angle_alpha                 90.00 
_cell_angle_beta                  90.00 
_cell_angle_gamma                 90.00 
_cell_volume                      631.49(18) 
_cell_formula_units_Z             4 
_cell_measurement_temperature     293(2) 
_cell_measurement_reflns_used     ? 
_cell_measurement_theta_min       5 
_cell_measurement_theta_max       28 
  
_exptl_crystal_description        irregular 
_exptl_crystal_colour             "copper metallic luster" 
_exptl_crystal_size_max           0.31 
_exptl_crystal_size_mid           0.25 
_exptl_crystal_size_min           0.19 
_exptl_crystal_density_meas       ? 
_exptl_crystal_density_diffrn     11.177 
_exptl_crystal_density_method     'not measured' 
_exptl_crystal_F_000              1741 
_exptl_absorpt_coefficient_mu     101.187 
_exptl_absorpt_correction_type    numerical
_exptl_absorpt_correction_T_min   ? 
_exptl_absorpt_correction_T_max   ? 
_exptl_absorpt_process_details    ? 
  
_exptl_special_details 
; 
 ? 
; 
  
_diffrn_ambient_temperature       293(2) 
_diffrn_radiation_wavelength      0.71073 
_diffrn_radiation_type            MoK\a 
_diffrn_radiation_source          'fine-focus sealed tube' 
_diffrn_radiation_monochromator   graphite 
_diffrn_measurement_device_type   'Bruker P4' 
_diffrn_measurement_method        '\w scans' 
_diffrn_detector_area_resol_mean  ? 
_diffrn_standards_number          ? 
_diffrn_standards_interval_count  ? 
_diffrn_standards_interval_time   ? 
_diffrn_standards_decay_%         ? 
_diffrn_reflns_number             410 
_diffrn_reflns_av_R_equivalents   0.0375 
_diffrn_reflns_av_sigmaI/netI     0.0415 
_diffrn_reflns_limit_h_min        -7 
_diffrn_reflns_limit_h_max        8 
_diffrn_reflns_limit_k_min        0 
_diffrn_reflns_limit_k_max        11 
_diffrn_reflns_limit_l_min        0 
_diffrn_reflns_limit_l_max        11 
_diffrn_reflns_theta_min          3.31 
_diffrn_reflns_theta_max          28.71 
_reflns_number_total              239 
_reflns_number_gt                 158 
_reflns_threshold_expression      >2sigma(I) 
  
_computing_data_collection        'Bruker XSCANS' 
_computing_cell_refinement        'Bruker XSCANS' 
_computing_data_reduction         'Bruker SHELXTL' 
_computing_structure_solution     'SHELXS-97 (Sheldrick, 1990)' 
_computing_structure_refinement   'SHELXL-97 (Sheldrick, 1997)' 
_computing_molecular_graphics     'Bruker SHELXTL' 
_computing_publication_material   'Bruker SHELXTL' 
  
_refine_special_details 
; 
 Refinement of F^2^ against ALL reflections.  The weighted R-factor wR and 
 goodness of fit S are based on F^2^, conventional R-factors R are based 
 on F, with F set to zero for negative F^2^. The threshold expression of 
 F^2^ > 2sigma(F^2^) is used only for calculating R-factors(gt) etc. and is 
 not relevant to the choice of reflections for refinement.  R-factors based 
 on F^2^ are statistically about twice as large as those based on F, and R- 
 factors based on ALL data will be even larger. 
; 
  
_refine_ls_structure_factor_coef  Fsqd 
_refine_ls_matrix_type            full 
_refine_ls_weighting_scheme       calc 
_refine_ls_weighting_details 
 'calc w=1/[\s^2^(Fo^2^)+(0.0191P)^2^+0.0000P] where P=(Fo^2^+2Fc^2^)/3' 
_atom_sites_solution_primary      direct 
_atom_sites_solution_secondary    difmap 
_atom_sites_solution_hydrogens    geom 
_refine_ls_hydrogen_treatment     mixed 
_refine_ls_extinction_method      SHELXL 
_refine_ls_extinction_coef        0.00022(6) 
_refine_ls_extinction_expression 
 'Fc^*^=kFc[1+0.001xFc^2^\l^3^/sin(2\q)]^-1/4^' 
_refine_ls_number_reflns          239 
_refine_ls_number_parameters      15 
_refine_ls_number_restraints      0 
_refine_ls_R_factor_all           0.0731 
_refine_ls_R_factor_gt            0.0396 
_refine_ls_wR_factor_ref          0.0732 
_refine_ls_wR_factor_gt           0.0691 
_refine_ls_goodness_of_fit_ref    1.350 
_refine_ls_restrained_S_all       1.350 
_refine_ls_shift/su_max           0.000 
_refine_ls_shift/su_mean          0.000 
  
loop_ 
 _atom_site_label 
 _atom_site_type_symbol 
 _atom_site_fract_x 
 _atom_site_fract_y 
 _atom_site_fract_z 
 _atom_site_U_iso_or_equiv 
 _atom_site_adp_type 
 _atom_site_occupancy 
 _atom_site_symmetry_multiplicity 
 _atom_site_calc_flag 
 _atom_site_refinement_flags 
 _atom_site_disorder_assembly 
 _atom_site_disorder_group 
Au Au 0.15023(11) 0.65023(11) 0.33470(16) 0.0206(4) Uani 1 2 d S . . 
In In 0.1456(4) 0.6456(4) 0.0000 0.0196(7) Uani 1 4 d S . . 
K K 0.0000 0.0000 0.2500 0.036(5) Uani 0.87(7) 8 d SP . . 
Rb Rb 0.0000 0.0000 0.2500 0.036(5) Uani 0.13(7) 8 d SP . . 
  
loop_ 
 _atom_site_aniso_label 
 _atom_site_aniso_U_11 
 _atom_site_aniso_U_22 
 _atom_site_aniso_U_33 
 _atom_site_aniso_U_23 
 _atom_site_aniso_U_13 
 _atom_site_aniso_U_12 
Au 0.0220(5) 0.0220(5) 0.0177(6) 0.0006(5) 0.0006(5) -0.0035(6) 
In 0.0187(9) 0.0187(9) 0.0212(14) 0.000 0.000 0.0033(19) 
K 0.015(4) 0.015(4) 0.078(11) 0.000 0.000 0.000 
Rb 0.015(4) 0.015(4) 0.078(11) 0.000 0.000 0.000 
  
_geom_special_details 
; 
 All esds (except the esd in the dihedral angle between two l.s. planes) 
 are estimated using the full covariance matrix.  The cell esds are taken 
 into account individually in the estimation of esds in distances, angles 
 and torsion angles; correlations between esds in cell parameters are only 
 used when they are defined by crystal symmetry.  An approximate (isotropic) 
 treatment of cell esds is used for estimating esds involving l.s. planes. 
; 
  
loop_ 
 _geom_bond_atom_site_label_1 
 _geom_bond_atom_site_label_2 
 _geom_bond_distance 
 _geom_bond_site_symmetry_2 
 _geom_bond_publ_flag 
Au Au 2.756(3) 18_556 ? 
Au In 2.7909(14) . ? 
Au Au 2.833(3) 25_565 ? 
Au In 2.865(3) 25_565 ? 
Au In 2.921(2) 11 ? 
Au In 2.921(2) 27_455 ? 
Au Au 2.972(2) 27_455 ? 
Au Au 2.972(2) 28 ? 
Au Rb 3.3874(7) 1_565 ? 
Au K 3.3874(7) 1_565 ? 
Au Rb 3.3874(7) 25 ? 
Au K 3.3874(7) 25 ? 
In Au 2.7909(14) 18 ? 
In Au 2.865(3) 25_565 ? 
In Au 2.865(3) 10_564 ? 
In Au 2.921(2) 12_454 ? 
In Au 2.921(2) 11_554 ? 
In Au 2.921(2) 27_455 ? 
In Au 2.921(2) 28 ? 
In Rb 3.9322(16) 1_565 ? 
In K 3.9322(16) 1_565 ? 
In Rb 3.9322(16) 25 ? 
In K 3.9322(16) 25 ? 
K Au 3.3874(7) 3_655 ? 
K Au 3.3874(7) 28_545 ? 
K Au 3.3874(7) 4_455 ? 
K Au 3.3874(7) 27_455 ? 
K Au 3.3874(7) 26_445 ? 
K Au 3.3874(7) 2_565 ? 
K Au 3.3874(7) 1_545 ? 
K Au 3.3874(7) 25 ? 
K In 3.9322(16) 27_455 ? 
K In 3.9322(16) 19_455 ? 
K In 3.9322(16) 1_545 ? 
K In 3.9322(16) 25 ? 
  
loop_ 
 _geom_angle_atom_site_label_1 
 _geom_angle_atom_site_label_2 
 _geom_angle_atom_site_label_3 
 _geom_angle 
 _geom_angle_site_symmetry_1 
 _geom_angle_site_symmetry_3 
 _geom_angle_publ_flag 
Au Au In 178.84(12) 18_556 . ? 
Au Au Au 119.90(6) 18_556 25_565 ? 
In Au Au 61.26(11) . 25_565 ? 
Au Au In 61.25(4) 18_556 25_565 ? 
In Au In 119.90(9) . 25_565 ? 
Au Au In 58.65(4) 25_565 25_565 ? 
Au Au In 61.85(3) 18_556 11 ? 
In Au In 117.32(7) . 11 ? 
Au Au In 141.63(9) 25_565 11 ? 
In Au In 109.15(7) 25_565 11 ? 
Au Au In 61.85(3) 18_556 27_455 ? 
In Au In 117.32(7) . 27_455 ? 
Au Au In 141.63(9) 25_565 27_455 ? 
In Au In 109.15(7) 25_565 27_455 ? 
In Au In 75.72(16) 11 27_455 ? 
Au Au Au 118.37(5) 18_556 27_455 ? 
In Au Au 60.81(8) . 27_455 ? 
Au Au Au 107.61(7) 25_565 27_455 ? 
In Au Au 140.717(11) 25_565 27_455 ? 
In Au Au 102.25(7) 11 27_455 ? 
In Au Au 56.53(3) 27_455 27_455 ? 
Au Au Au 118.37(5) 18_556 28 ? 
In Au Au 60.81(8) . 28 ? 
Au Au Au 107.61(7) 25_565 28 ? 
In Au Au 140.717(11) 25_565 28 ? 
In Au Au 56.53(3) 11 28 ? 
In Au Au 102.25(7) 27_455 28 ? 
Au Au Au 76.95(4) 27_455 28 ? 
Au Au Rb 102.03(2) 18_556 1_565 ? 
In Au Rb 78.40(5) . 1_565 ? 
Au Au Rb 65.28(2) 25_565 1_565 ? 
In Au Rb 77.433(17) 25_565 1_565 ? 
In Au Rb 76.72(7) 11 1_565 ? 
In Au Rb 152.29(10) 27_455 1_565 ? 
Au Au Rb 133.76(6) 27_455 1_565 ? 
Au Au Rb 63.98(2) 28 1_565 ? 
Au Au K 102.03(2) 18_556 1_565 ? 
In Au K 78.40(5) . 1_565 ? 
Au Au K 65.28(2) 25_565 1_565 ? 
In Au K 77.433(17) 25_565 1_565 ? 
In Au K 76.72(7) 11 1_565 ? 
In Au K 152.29(10) 27_455 1_565 ? 
Au Au K 133.76(6) 27_455 1_565 ? 
Au Au K 63.98(2) 28 1_565 ? 
Rb Au K 0.0 1_565 1_565 ? 
Au Au Rb 102.03(2) 18_556 25 ? 
In Au Rb 78.40(5) . 25 ? 
Au Au Rb 65.28(2) 25_565 25 ? 
In Au Rb 77.433(17) 25_565 25 ? 
In Au Rb 152.29(10) 11 25 ? 
In Au Rb 76.72(7) 27_455 25 ? 
Au Au Rb 63.98(2) 27_455 25 ? 
Au Au Rb 133.76(6) 28 25 ? 
Rb Au Rb 130.56(4) 1_565 25 ? 
K Au Rb 130.56(4) 1_565 25 ? 
Au Au K 102.03(2) 18_556 25 ? 
In Au K 78.40(5) . 25 ? 
Au Au K 65.28(2) 25_565 25 ? 
In Au K 77.433(17) 25_565 25 ? 
In Au K 152.29(10) 11 25 ? 
In Au K 76.72(7) 27_455 25 ? 
Au Au K 63.98(2) 27_455 25 ? 
Au Au K 133.76(6) 28 25 ? 
Rb Au K 130.56(4) 1_565 25 ? 
K Au K 130.56(4) 1_565 25 ? 
Rb Au K 0.0 25 25 ? 
Au In Au 177.7(2) . 18 ? 
Au In Au 60.10(9) . 25_565 ? 
Au In Au 117.59(15) 18 25_565 ? 
Au In Au 117.59(15) . 10_564 ? 
Au In Au 60.10(9) 18 10_564 ? 
Au In Au 57.49(9) 25_565 10_564 ? 
Au In Au 118.95(10) . 12_454 ? 
Au In Au 62.66(6) 18 12_454 ? 
Au In Au 139.91(8) 25_565 12_454 ? 
Au In Au 108.13(6) 10_564 12_454 ? 
Au In Au 118.95(10) . 11_554 ? 
Au In Au 62.66(6) 18 11_554 ? 
Au In Au 139.91(8) 25_565 11_554 ? 
Au In Au 108.13(6) 10_564 11_554 ? 
Au In Au 78.55(13) 12_454 11_554 ? 
Au In Au 62.66(6) . 27_455 ? 
Au In Au 118.95(10) 18 27_455 ? 
Au In Au 108.13(6) 25_565 27_455 ? 
Au In Au 139.91(8) 10_564 27_455 ? 
Au In Au 56.30(7) 12_454 27_455 ? 
Au In Au 104.28(16) 11_554 27_455 ? 
Au In Au 62.66(6) . 28 ? 
Au In Au 118.95(10) 18 28 ? 
Au In Au 108.13(6) 25_565 28 ? 
Au In Au 139.91(8) 10_564 28 ? 
Au In Au 104.28(16) 12_454 28 ? 
Au In Au 56.30(7) 11_554 28 ? 
Au In Au 78.55(13) 27_455 28 ? 
Au In Rb 57.55(3) . 1_565 ? 
Au In Rb 121.56(6) 18 1_565 ? 
Au In Rb 57.23(4) 25_565 1_565 ? 
Au In Rb 88.20(8) 10_564 1_565 ? 
Au In Rb 161.07(15) 12_454 1_565 ? 
Au In Rb 87.43(2) 11_554 1_565 ? 
Au In Rb 116.47(5) 27_455 1_565 ? 
Au In Rb 56.98(2) 28 1_565 ? 
Au In K 57.55(3) . 1_565 ? 
Au In K 121.56(6) 18 1_565 ? 
Au In K 57.23(4) 25_565 1_565 ? 
Au In K 88.20(8) 10_564 1_565 ? 
Au In K 161.07(15) 12_454 1_565 ? 
Au In K 87.43(2) 11_554 1_565 ? 
Au In K 116.47(5) 27_455 1_565 ? 
Au In K 56.98(2) 28 1_565 ? 
Rb In K 0.0 1_565 1_565 ? 
Au In Rb 57.55(3) . 25 ? 
Au In Rb 121.56(6) 18 25 ? 
Au In Rb 57.23(4) 25_565 25 ? 
Au In Rb 88.20(8) 10_564 25 ? 
Au In Rb 87.43(2) 12_454 25 ? 
Au In Rb 161.07(15) 11_554 25 ? 
Au In Rb 56.98(2) 27_455 25 ? 
Au In Rb 116.47(5) 28 25 ? 
Rb In Rb 102.99(6) 1_565 25 ? 
K In Rb 102.99(6) 1_565 25 ? 
Au In K 57.55(3) . 25 ? 
Au In K 121.56(6) 18 25 ? 
Au In K 57.23(4) 25_565 25 ? 
Au In K 88.20(8) 10_564 25 ? 
Au In K 87.43(2) 12_454 25 ? 
Au In K 161.07(15) 11_554 25 ? 
Au In K 56.98(2) 27_455 25 ? 
Au In K 116.47(5) 28 25 ? 
Rb In K 102.99(6) 1_565 25 ? 
K In K 102.99(6) 1_565 25 ? 
Rb In K 0.0 25 25 ? 
Au K Au 137.49(4) 3_655 28_545 ? 
Au K Au 155.94(4) 3_655 4_455 ? 
Au K Au 49.44(4) 28_545 4_455 ? 
Au K Au 49.44(4) 3_655 27_455 ? 
Au K Au 155.94(4) 28_545 27_455 ? 
Au K Au 137.49(4) 4_455 27_455 ? 
Au K Au 134.59(4) 3_655 26_445 ? 
Au K Au 87.510(9) 28_545 26_445 ? 
Au K Au 52.04(5) 4_455 26_445 ? 
Au K Au 87.510(9) 27_455 26_445 ? 
Au K Au 87.510(9) 3_655 2_565 ? 
Au K Au 134.59(4) 28_545 2_565 ? 
Au K Au 87.510(9) 4_455 2_565 ? 
Au K Au 52.04(5) 27_455 2_565 ? 
Au K Au 49.44(4) 26_445 2_565 ? 
Au K Au 87.510(9) 3_655 1_545 ? 
Au K Au 52.04(5) 28_545 1_545 ? 
Au K Au 87.510(9) 4_455 1_545 ? 
Au K Au 134.59(4) 27_455 1_545 ? 
Au K Au 137.49(4) 26_445 1_545 ? 
Au K Au 155.94(4) 2_565 1_545 ? 
Au K Au 52.04(5) 3_655 25 ? 
Au K Au 87.510(9) 28_545 25 ? 
Au K Au 134.59(4) 4_455 25 ? 
Au K Au 87.510(9) 27_455 25 ? 
Au K Au 155.94(4) 26_445 25 ? 
Au K Au 137.49(4) 2_565 25 ? 
Au K Au 49.44(4) 1_545 25 ? 
Au K In 45.34(5) 3_655 27_455 ? 
Au K In 160.01(3) 28_545 27_455 ? 
Au K In 118.81(4) 4_455 27_455 ? 
Au K In 44.05(3) 27_455 27_455 ? 
Au K In 95.59(8) 26_445 27_455 ? 
Au K In 46.30(5) 2_565 27_455 ? 
Au K In 118.03(5) 1_545 27_455 ? 
Au K In 97.10(8) 25 27_455 ? 
Au K In 160.01(3) 3_655 19_455 ? 
Au K In 45.34(5) 28_545 19_455 ? 
Au K In 44.05(3) 4_455 19_455 ? 
Au K In 118.81(4) 27_455 19_455 ? 
Au K In 46.30(5) 26_445 19_455 ? 
Au K In 95.59(8) 2_565 19_455 ? 
Au K In 97.10(8) 1_545 19_455 ? 
Au K In 118.03(5) 25 19_455 ? 
In K In 141.87(13) 27_455 19_455 ? 
Au K In 97.10(8) 3_655 1_545 ? 
Au K In 46.30(5) 28_545 1_545 ? 
Au K In 95.59(8) 4_455 1_545 ? 
Au K In 118.03(5) 27_455 1_545 ? 
Au K In 118.81(4) 26_445 1_545 ? 
Au K In 160.01(3) 2_565 1_545 ? 
Au K In 44.05(3) 1_545 1_545 ? 
Au K In 45.34(5) 25 1_545 ? 
In K In 142.39(12) 27_455 1_545 ? 
In K In 73.683(14) 19_455 1_545 ? 
Au K In 46.30(5) 3_655 25 ? 
Au K In 97.10(8) 28_545 25 ? 
Au K In 118.03(5) 4_455 25 ? 
Au K In 95.59(8) 27_455 25 ? 
Au K In 160.01(3) 26_445 25 ? 
Au K In 118.81(4) 2_565 25 ? 
Au K In 45.34(5) 1_545 25 ? 
Au K In 44.05(3) 25 25 ? 
In K In 73.683(14) 27_455 25 ? 
In K In 142.39(12) 19_455 25 ? 
In K In 77.01(6) 1_545 25 ? 
  
_diffrn_measured_fraction_theta_max    0.992 
_diffrn_reflns_theta_full              25.00 
_diffrn_measured_fraction_theta_full   1.000 
_refine_diff_density_max    3.342 
_refine_diff_density_min   -1.597 
_refine_diff_density_rms    0.641 
